# Supplementary material for: Glial Fibrillary Acidic Protein: A Biomarker and Drug Target for Alzheimer’s Disease
Source: Pharmaceutics. 2022 Jun 26;14(7):1354. doi: 10.3390/pharmaceutics14071354 (PMC9322874; doi:10.3390/pharmaceutics14071354)
Supplement: Supplementary file 1 [file pharmaceutics-14-01354-s001.zip › pharmaceutics-1758483-supplementary.pdf]

## Supplementary Materials

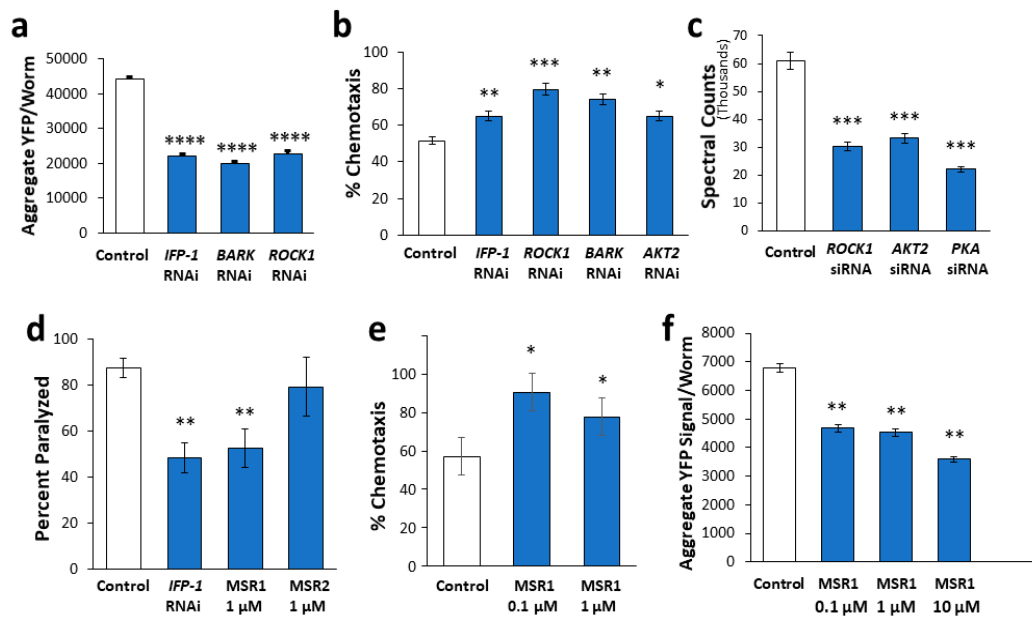

**Supplementary Figure S1. MSR1 treatment attenuates aggregates and its associated phenotypic traits in *C. elegans* models of AD.** (a) RNAi knockdown of *BARK* or *ROCK1* in strain AM141 (a model of Huntington's disease with muscle expression of Q40::YFP), is compared to the effect of RNAi targeting *IFP-1*, the closest *C. elegans* homolog of *GFAP*. (b) RNAi knockdown of *ROCK1*, *BARK* or *AKT2*, in strain CL2355 (an AD model with pan-neuronal expression of human A $\beta$ <sub>1-42</sub>). (c) RNAi knockdown of *ROCK1*, *AKT2* or *BARK*, in human T98G cells, reduces the total aggregate burden (measured as total spectral counts for sarkosyl-insoluble material). (d) MSR1 protects against aggregation of tau, expressed in muscle of *C. elegans* strain VH255. (e) Chemotaxis of *C. elegans* strain CL2355, an AD model with pan-neuronal expression of human A $\beta$ <sub>1-42</sub>. Chemotaxis to n-butanol was determined for adult worms on day 5 post-hatch. (f) Calculated average aggregate fluorescence per worm in *C. elegans* strain AM141 (*q40::yfp*), a model of HD featuring muscle expression of polyglutamine (Q40) fused in-frame to the gene encoding yellow fluorescent protein (YFP). YFP-positive aggregates were counted in adult worms on day 5 post-hatch. (a – f) Differences from controls are significant by heteroscedastic, 2-tailed *t* tests at \**P*≤0.05; \*\**P*≤0.005; \*\*\**P*≤0.0005; \*\*\*\**P*≤0.00005. Experiments were replicated 3 – 4 times, with consistent results.

**Table S1:** Kinases predicted to be capable of phosphorylating GFAP sites.

| <b>PTM<br/>Position</b> | <b>Phosphorylated<br/>Amino Acid</b> | <b>Kinase</b>              | <b>Peptide<br/>Sequence</b> | <b>Actual<br/>Score</b> | <b>Cutoff<br/>Score</b> |
|-------------------------|--------------------------------------|----------------------------|-----------------------------|-------------------------|-------------------------|
| 13                      | S                                    | AGC, ROCK1,<br>or AKT/AKT2 | ITSAARR <u>S</u> YVSSGEM    | 27.88                   | 20.90                   |
| 16                      | S                                    | ROCK1 or AKT               | AARRSYV <u>S</u> SGEMMVG    | 12.02                   | 11.64                   |
| 323                     | S                                    | AGC or<br>BARK/GRK         | RHVREA <u>A</u> SYQEALAR    | 2.12                    | 2.10                    |
| 337                     | S                                    | PKA or PKC $\alpha$        | RLEEEGQ <u>S</u> LKDEMAR    | 119.80                  | 104.65                  |
| 396                     | T                                    | BARK/GRK                   | IRETSLD <u>T</u> KSVSEGH    | 171.89                  | 151.15                  |
| 398                     | S                                    | AGC or PKA                 | ETSLDTK <u>S</u> VSEGLK     | 21.30                   | 21.27                   |
